# Supplementary material for: A peroxyoxalate chemiluminescence recovery system based on the interaction of N-doped graphene oxide nanosheets and an oligopeptide for ultra-sensitive and selective copper(ii) ion detection
Source: Royal Society of Chemistry journal article supplement (doi:10.1039/d2ay00425a), 2022-01-01
Supplement: d2ay00425a1.pdf [file d2ay00425a1.pdf]

**A peroxyoxalate chemiluminescence recovery system based on the interaction of  
N-doped graphene oxide nanosheets and oligopeptide for ultra-sensitive and  
selective copper ion (II) detection**

Hongyan Tan,<sup>a,1</sup> Hong Zhou,<sup>a,1</sup> Donghua Chen<sup>\*a</sup>

<sup>a</sup> Key Laboratory of Environmentally Friendly Chemistry and Applications of Ministry of Education,

College of Chemistry, Xiangtan University, Xiangtan 411105, Hunan, China

\* Corresponding author: Tel: (+86)0731-58292253; Fax: (+86)0731-58292253

Email: donghuachen@xtu.edu.cn

<sup>1</sup> Author Contributions: these authors contributed equally

XPS results (Figure S1) showed that there were characteristic peaks at 531.8, 285 and 400 eV corresponding to O, C and N elements respectively for N-GONs.

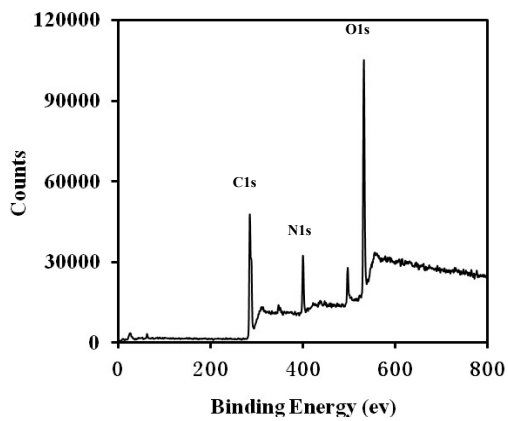

**Figure S1. Characterization of the N-GONs by XPS.**

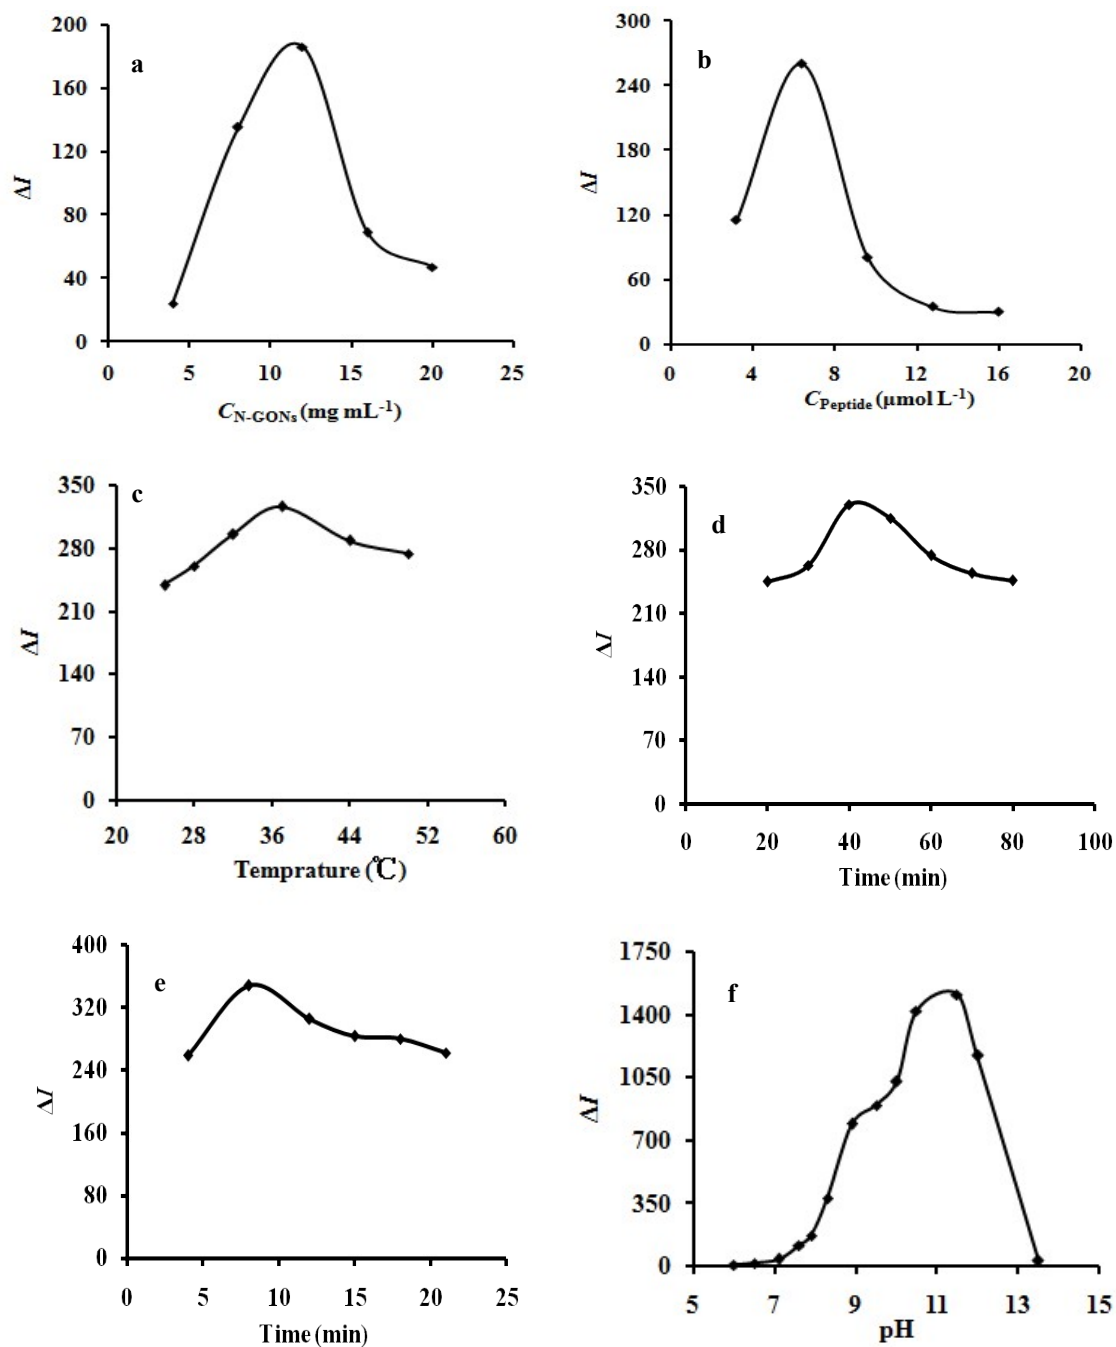

**Figure S2. Optimization of the CL assay conditions.** The amount of N-GONs (a), the amount of oligopeptide (b), the incubation temperature (c) and time (d) of the forming of N-GONs/oligopeptide, the incubation time of the  $Cu^{2+}$  adding to N-GONs/oligopeptide solution (e), and the pH value of the buffer solution (f). The concentrations were as follows:  $5 \times 10^{-4} mol L^{-1}$  TCPO,  $0.1 mol L^{-1} H_2O_2$  and  $5 \times 10^{-12} mol L^{-1} Cu^{2+}$ .
